# Supplementary material
Source: PubMed Central journal article supplement (PMC8595627)
Supplement: NIHMS1740300-supplement-2.pdf [file NIHMS1740300-supplement-2.pdf]

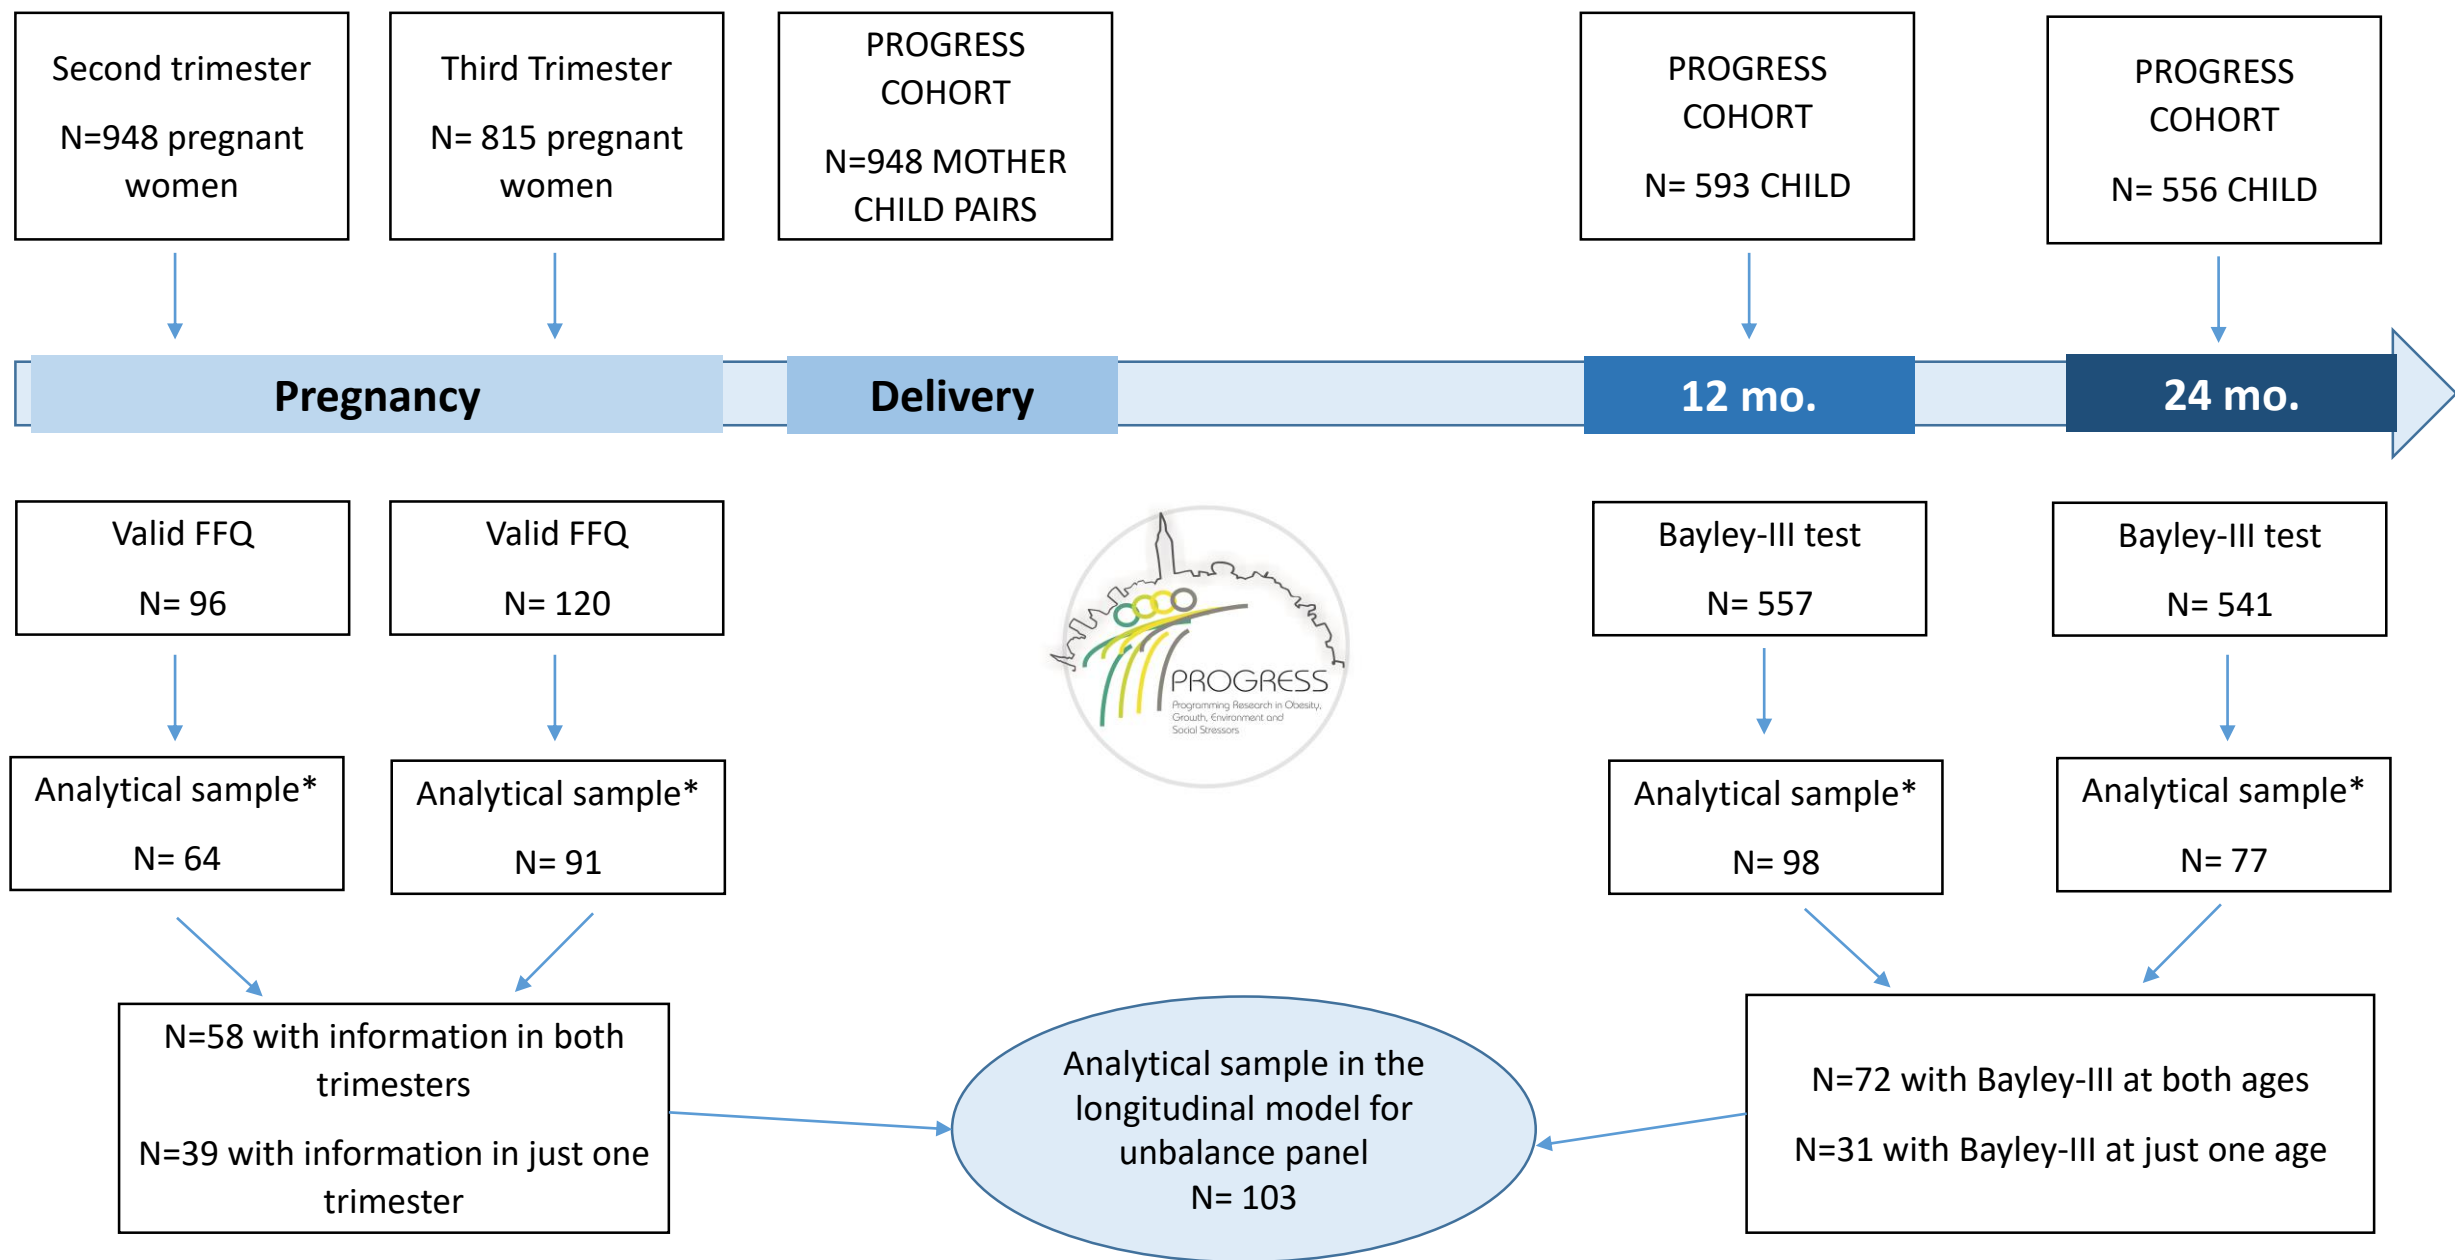

\*To be included in the analytic sample, participant must have at least one valid FFQ, at least one Bayley-III test, and complete covariates.
